# Supplementary material for: Association between life span and body condition in neutered client‐owned dogs
Source: PubMed Central journal article supplement — J Vet Intern Med. 2018 Dec 11;33(1):89–99. doi: 10.1111/jvim.15367 (PMC6335446; doi:10.1111/jvim.15367), 2018-12-11

**Supplementary Table S1.** Changes in imbalance from Coarsened Exact Matching.

| <b>Breed</b>            | <b>L1 Unmatched</b> | <b>L1 Matched</b> | <b>L1 Change</b> |
|-------------------------|---------------------|-------------------|------------------|
| American cocker spaniel | 0.913               | 0.325             | 0.589            |
| Beagle                  | 0.921               | 0.275             | 0.645            |
| Boxer                   | 0.88                | 0.381             | 0.499            |
| Chihuahua               | 0.832               | 0.232             | 0.6              |
| Dachshund               | 0.898               | 0.263             | 0.635            |
| German shepherd         | 0.919               | 0.368             | 0.551            |
| Golden retriever        | 0.919               | 0.365             | 0.554            |
| Labrador retriever      | 0.902               | 0.342             | 0.56             |
| Pit bull                | 0.894               | 0.34              | 0.554            |
| Pomeranian              | 0.888               | 0.309             | 0.579            |
| Shih tzu                | 0.849               | 0.218             | 0.631            |
| Yorkshire terrier       | 0.821               | 0.238             | 0.583            |

The ‘L1 norm’ measures distance between multi-variate histograms, and is used to assess changes in imbalance from applying the CEM methodology.<sup>21</sup> The treatment and control groups are first divided into  $k$  bins, and the difference between the proportion of treated observations in each bin and the proportion of control observations in each bin is then calculated. Completely imperfect balance is defined as  $L1=1$  and perfect balance defined as  $L1=0$ .<sup>21</sup> The L1 distance is shown for 12 breeds, before (unmatched) and after (matched) matching. The change in L1 distance (L1 change) due to matching is also shown.

**Supplementary Figure S1. Survival probability models for male neutered (a) and female spayed (b)**

**Boxer dogs.** Middle lines depict the probability of survival for a dog at 7.5y age in 2003 (assuming survival to at least 9.5 years), with the upper and lower lines depicting 99.79 % confidence intervals. The survival of dogs in the normal body condition group is shown in blue, whilst that of the overweight group is shown in red.

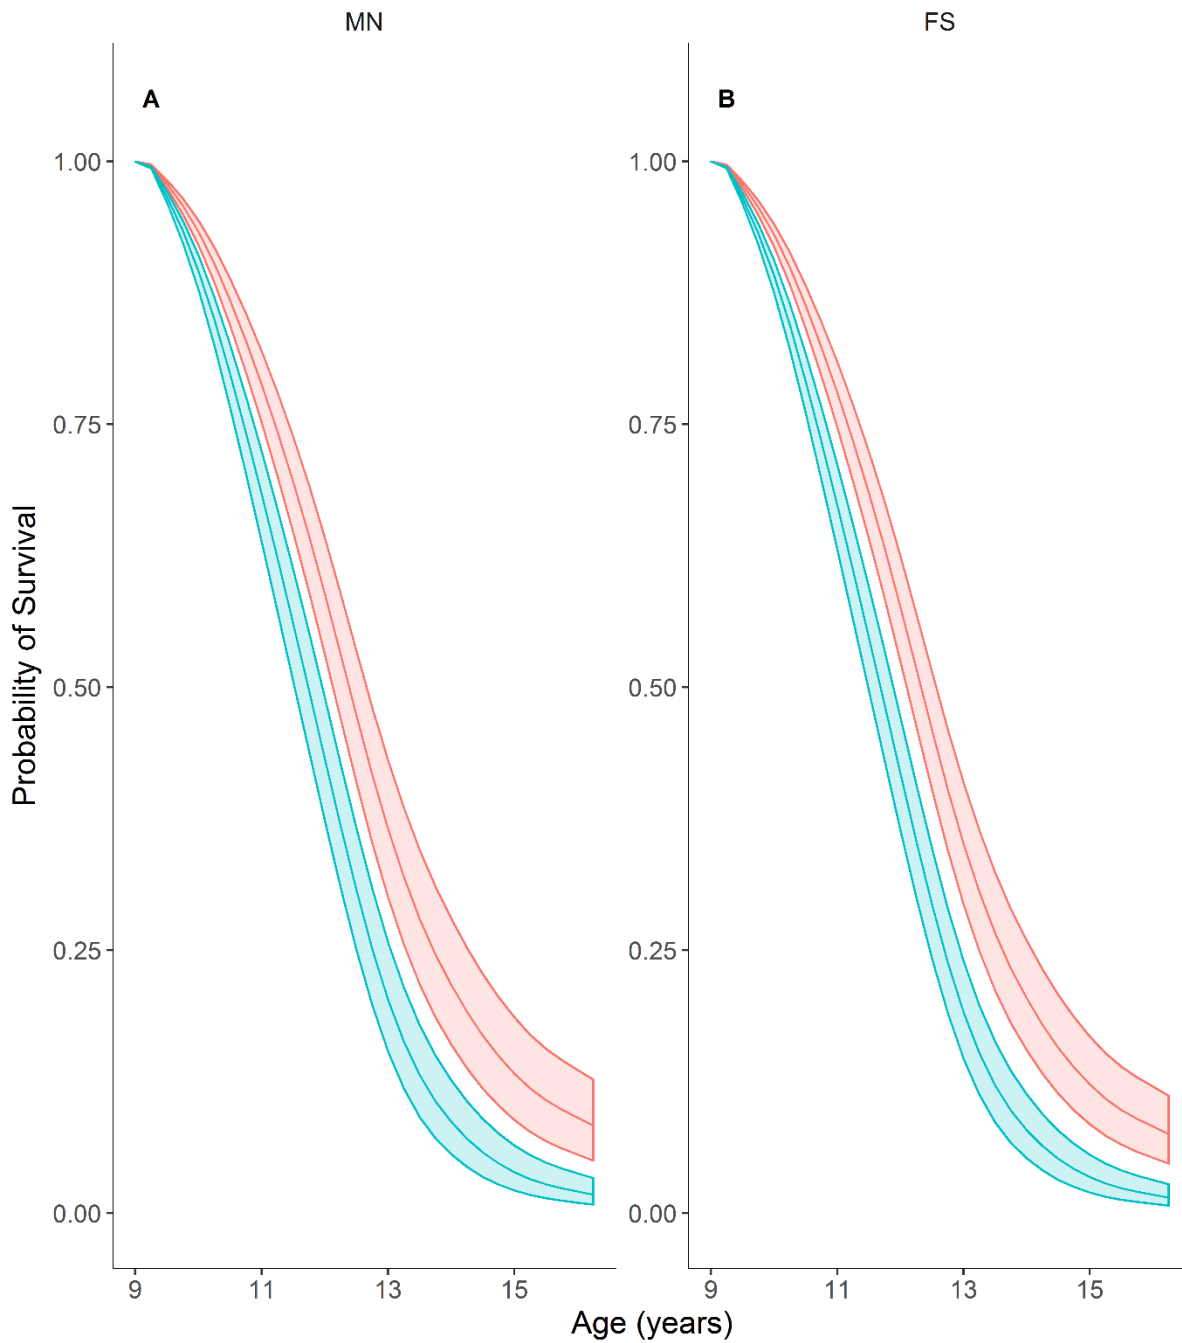

**Supplementary Figure S2. Survival probability models for male neutered (a) and female spayed (b)**

**Golden retriever dogs.** Middle lines depict the probability of survival for a dog at 7.5y age in 2003 (assuming survival to at least 9.5 years), with the upper and lower lines depicting 99.79 % confidence intervals. The survival of dogs in the normal body condition group is shown in blue, whilst that of the overweight group is shown in red.

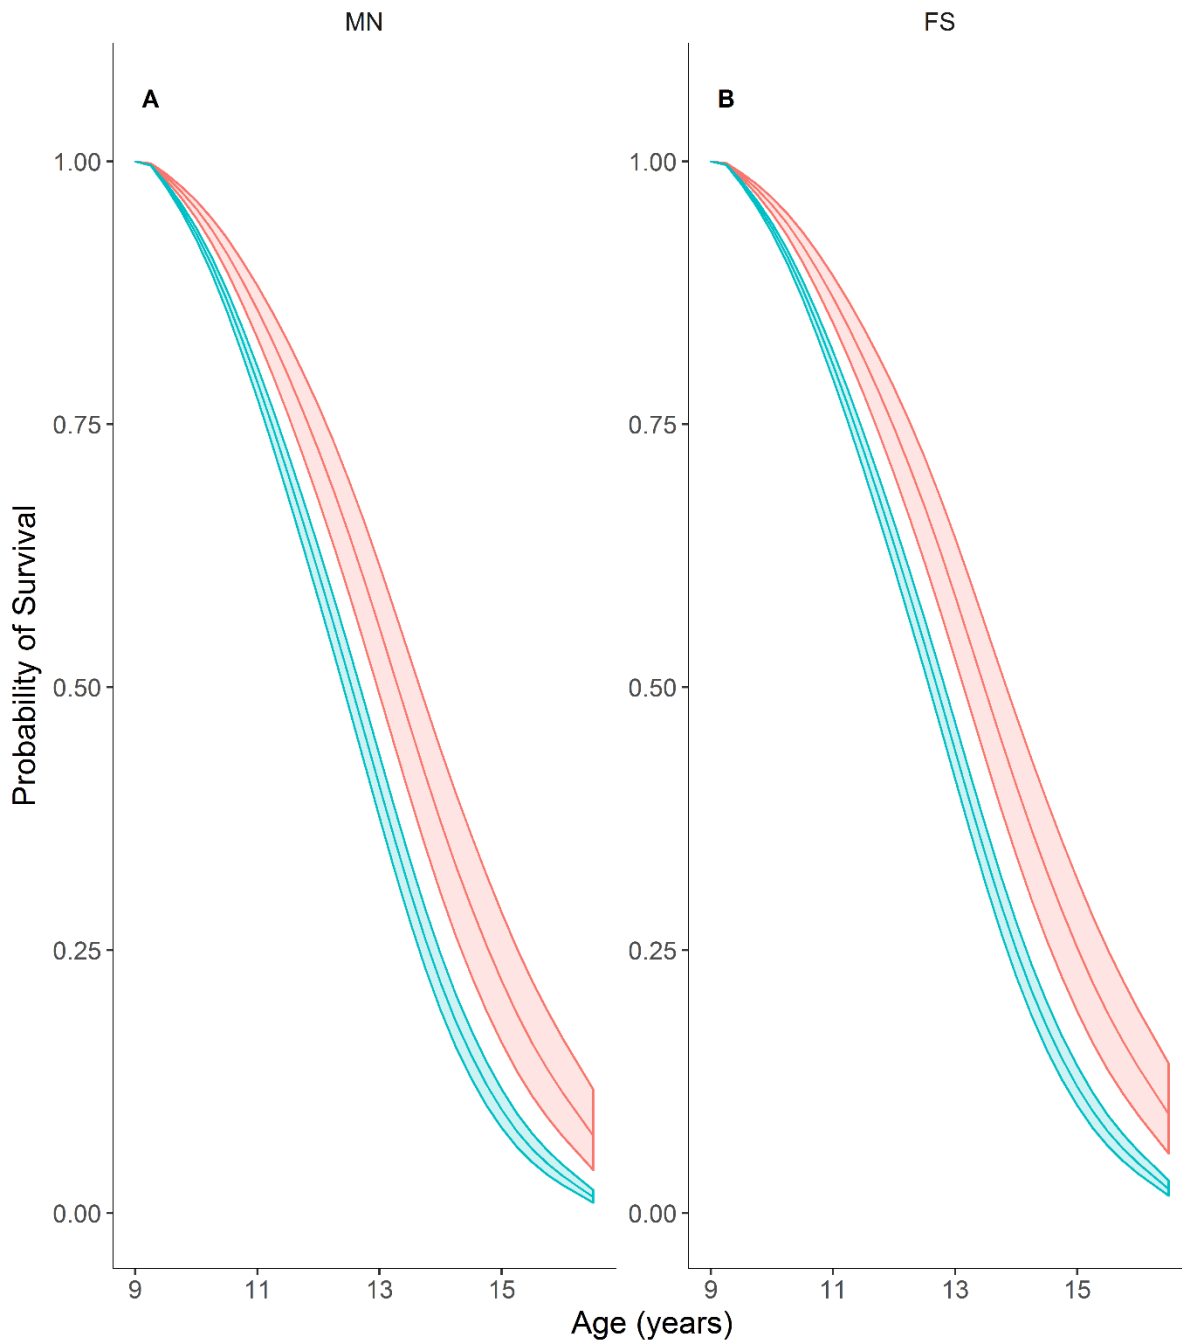

**Supplementary Figure S3. Survival probability models for male neutered (a) and female spayed (b) Pomeranian dogs.** Middle lines depict the probability of survival for a dog at 7.5y age in 2003 (assuming survival to at least 9.5 years), with the upper and lower lines depicting 99.79 % confidence intervals. The survival of dogs in the normal body condition group is shown in blue, whilst that of the overweight group is shown in red.

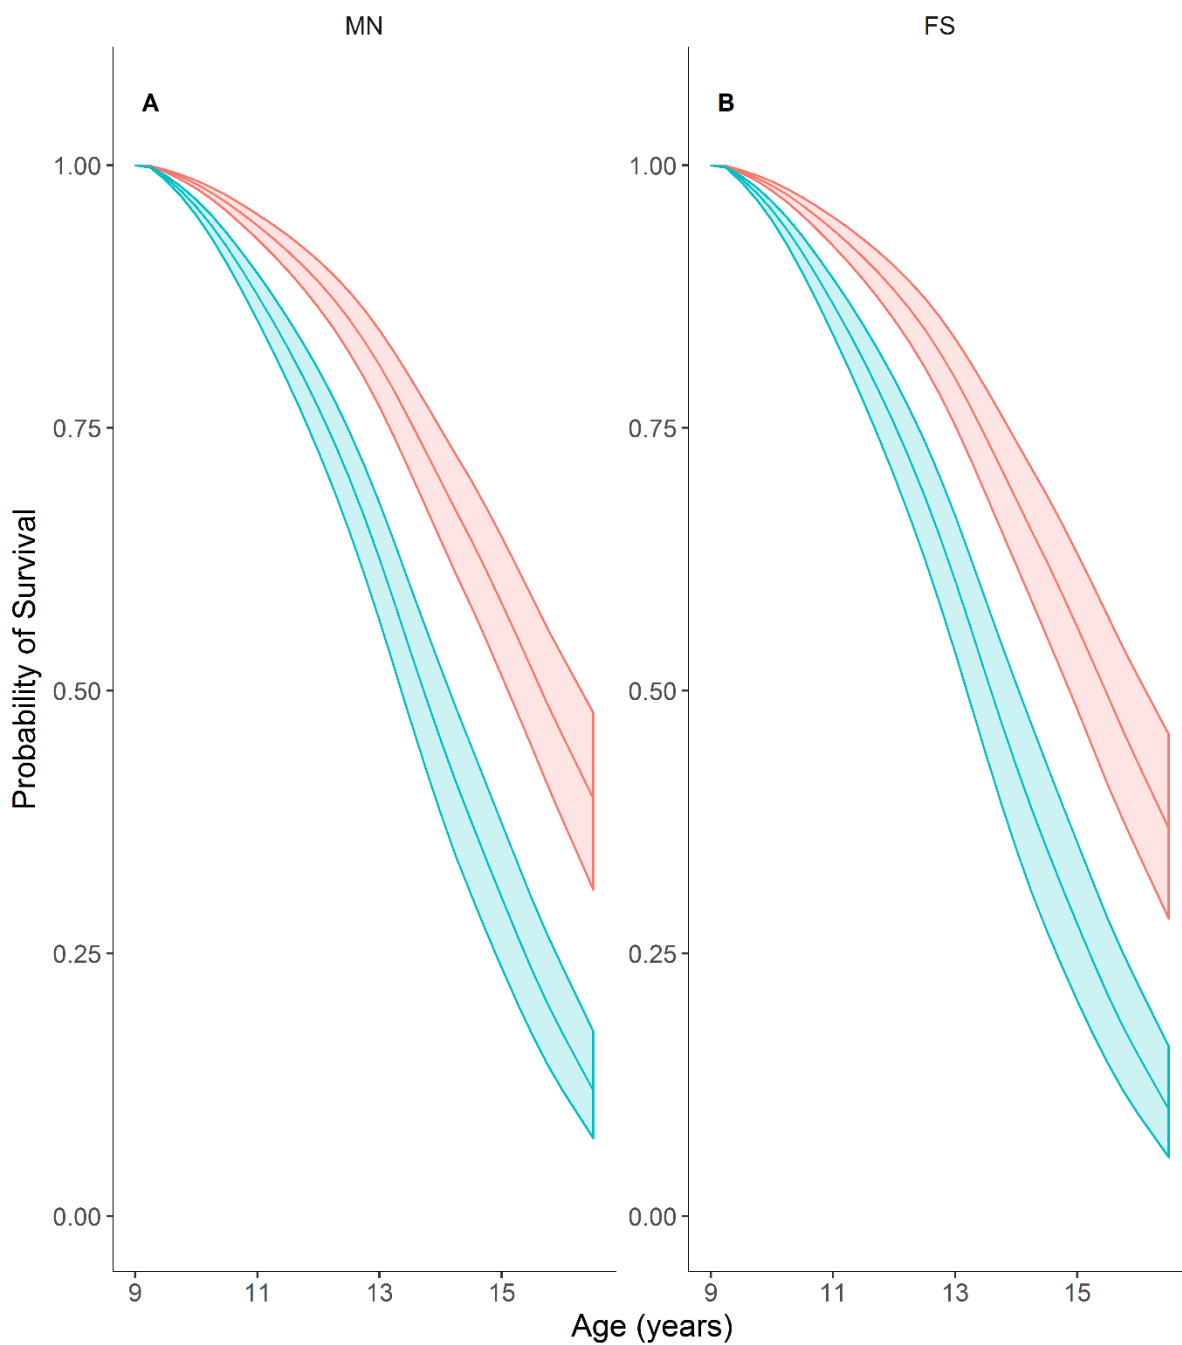

**Supplementary Figure S4. Survival probability models for male neutered (a) and female spayed (b)**

**Beagle dogs.** Middle lines depict the probability of survival for a dog at 7.5y age in 2003 (assuming survival to at least 9.5 years), with the upper and lower lines depicting 99.79 % confidence intervals. The survival of dogs in the normal body condition group is shown in blue, whilst that of the overweight group is shown in red.

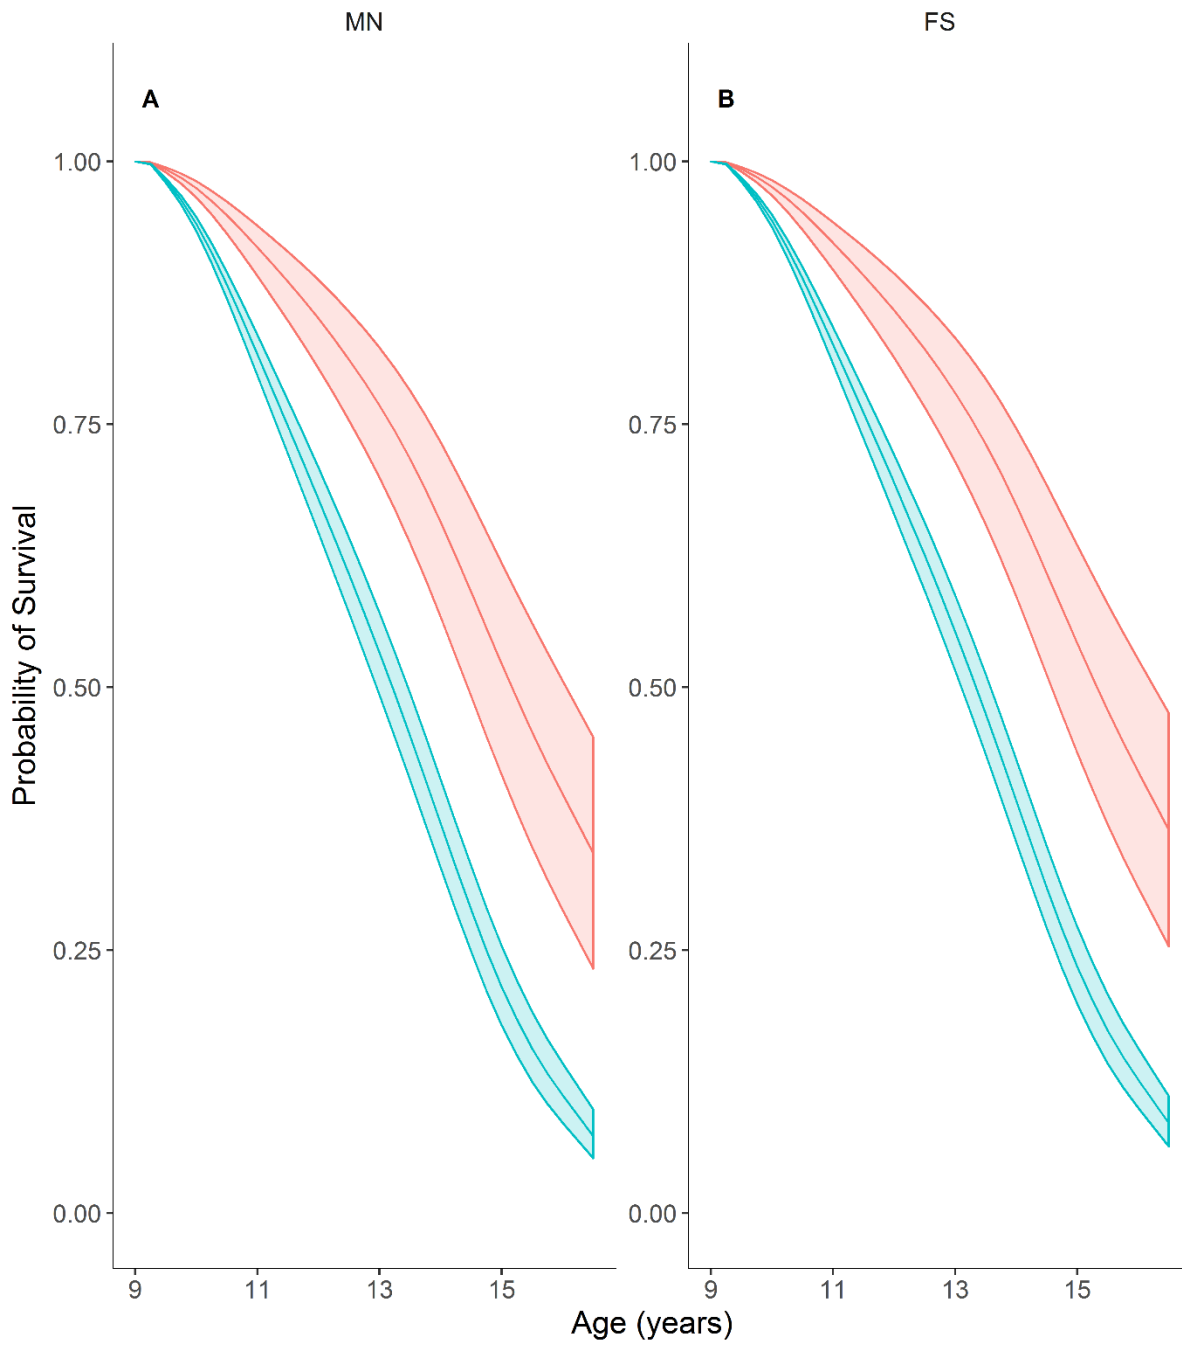

**Supplementary Figure S5. Survival probability models for male neutered (a) and female spayed (b)**

**American cocker spaniel dogs.** Middle lines depict the probability of survival for a dog at 7.5y age in 2003 (assuming survival to at least 9.5 years), with the upper and lower lines depicting 99.79 % confidence intervals. The survival of dogs in the normal body condition group is shown in blue, whilst that of the overweight group is shown in red.

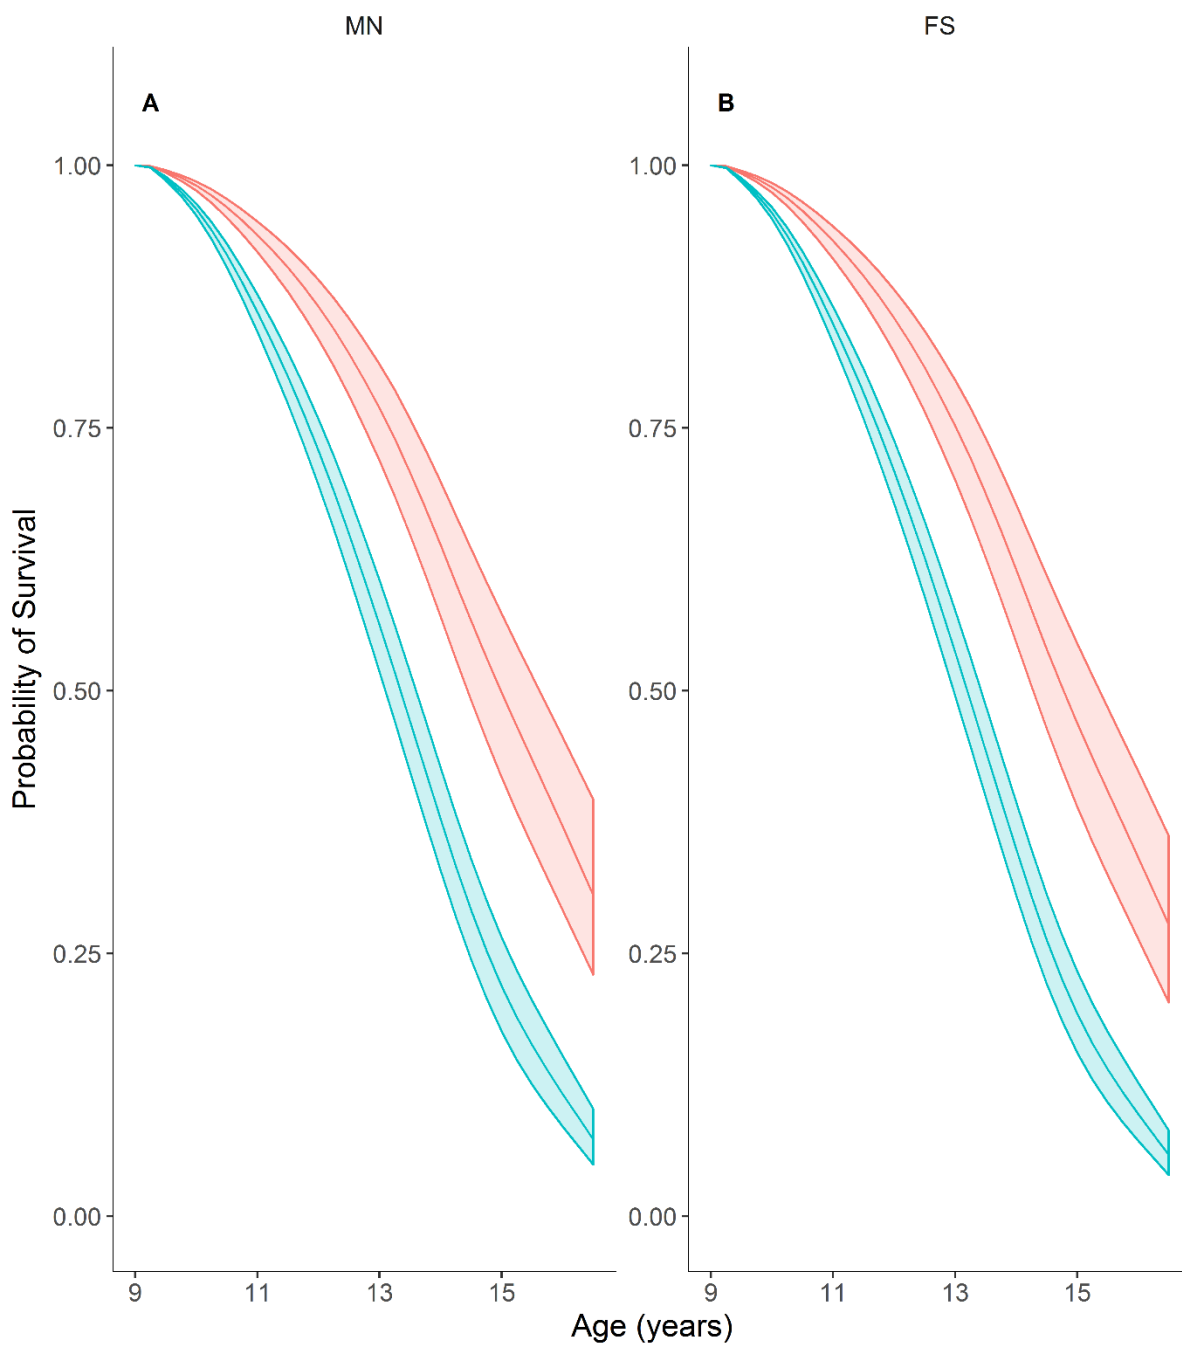

**Supplementary Figure S6. Survival probability models for male neutered (a) and female spayed (b) Dachshund dogs.** Middle lines depict the probability of survival for a dog at 7.5y age in 2003 (assuming survival to at least 9.5 years), with the upper and lower lines depicting 99.79 % confidence intervals. The survival of dogs in the normal body condition group is shown in blue, whilst that of the overweight group is shown in red.

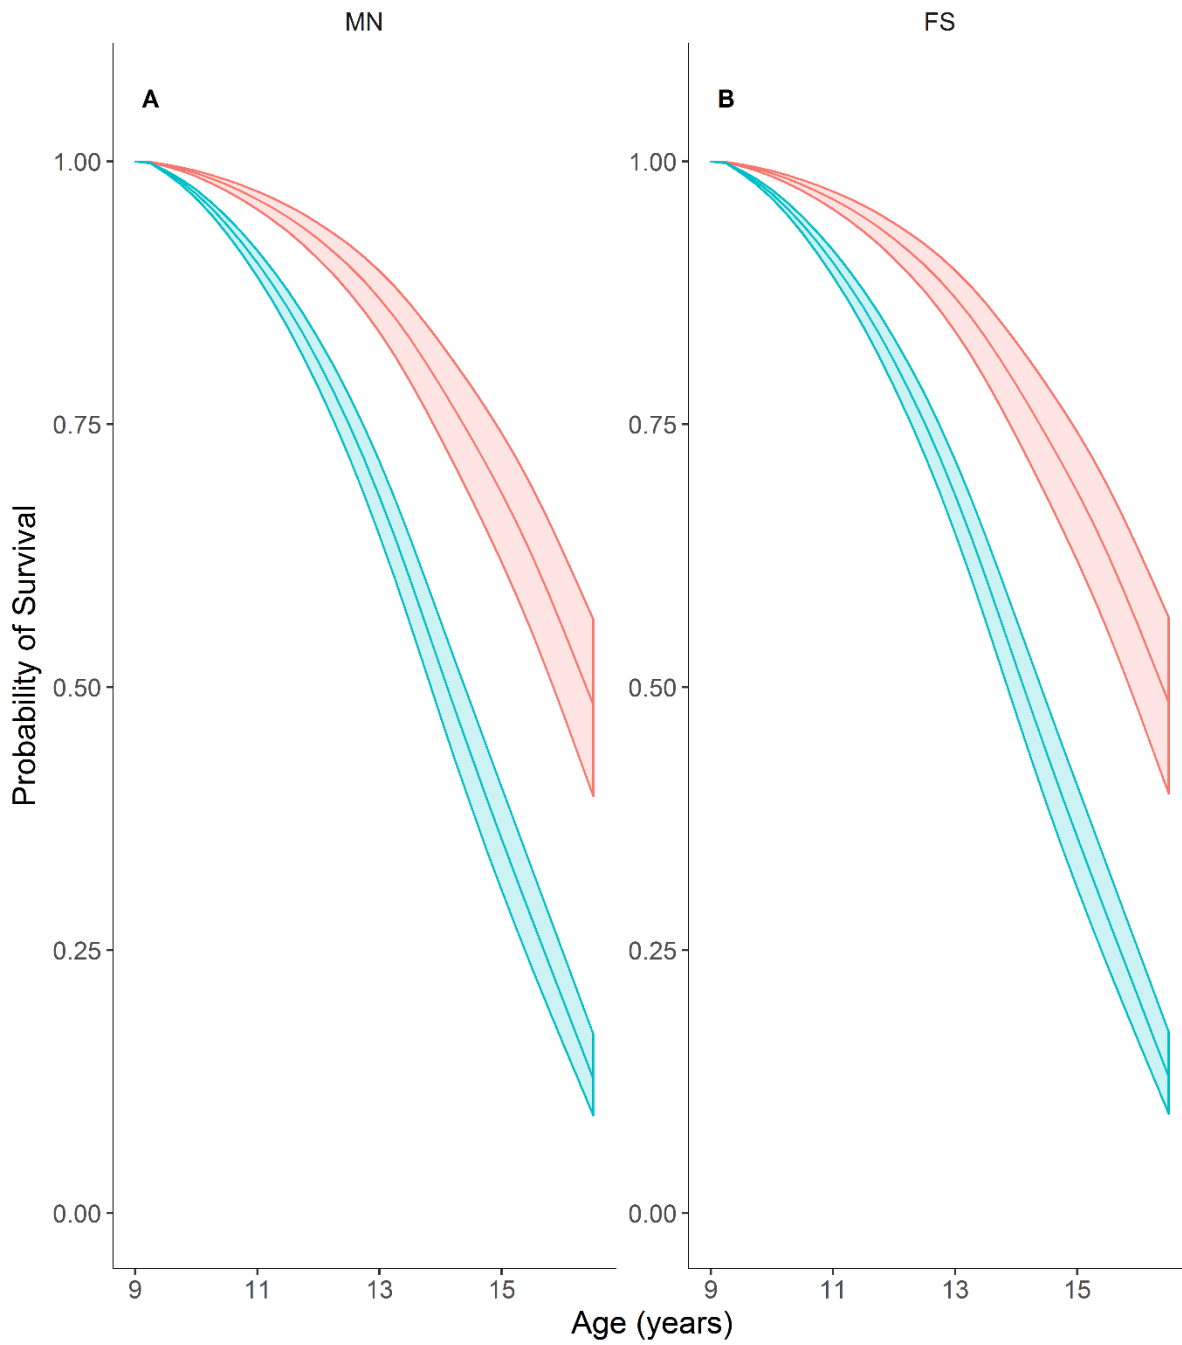

**Supplementary Figure S7. Survival probability models for male neutered (a) and female spayed (b)**

**Labrador retriever dogs.** Middle lines depict the probability of survival for a dog at 7.5y age in 2003 (assuming survival to at least 9.5 years), with the upper and lower lines depicting 99.79 % confidence intervals. The survival of dogs in the normal body condition group is shown in blue, whilst that of the overweight group is shown in red.

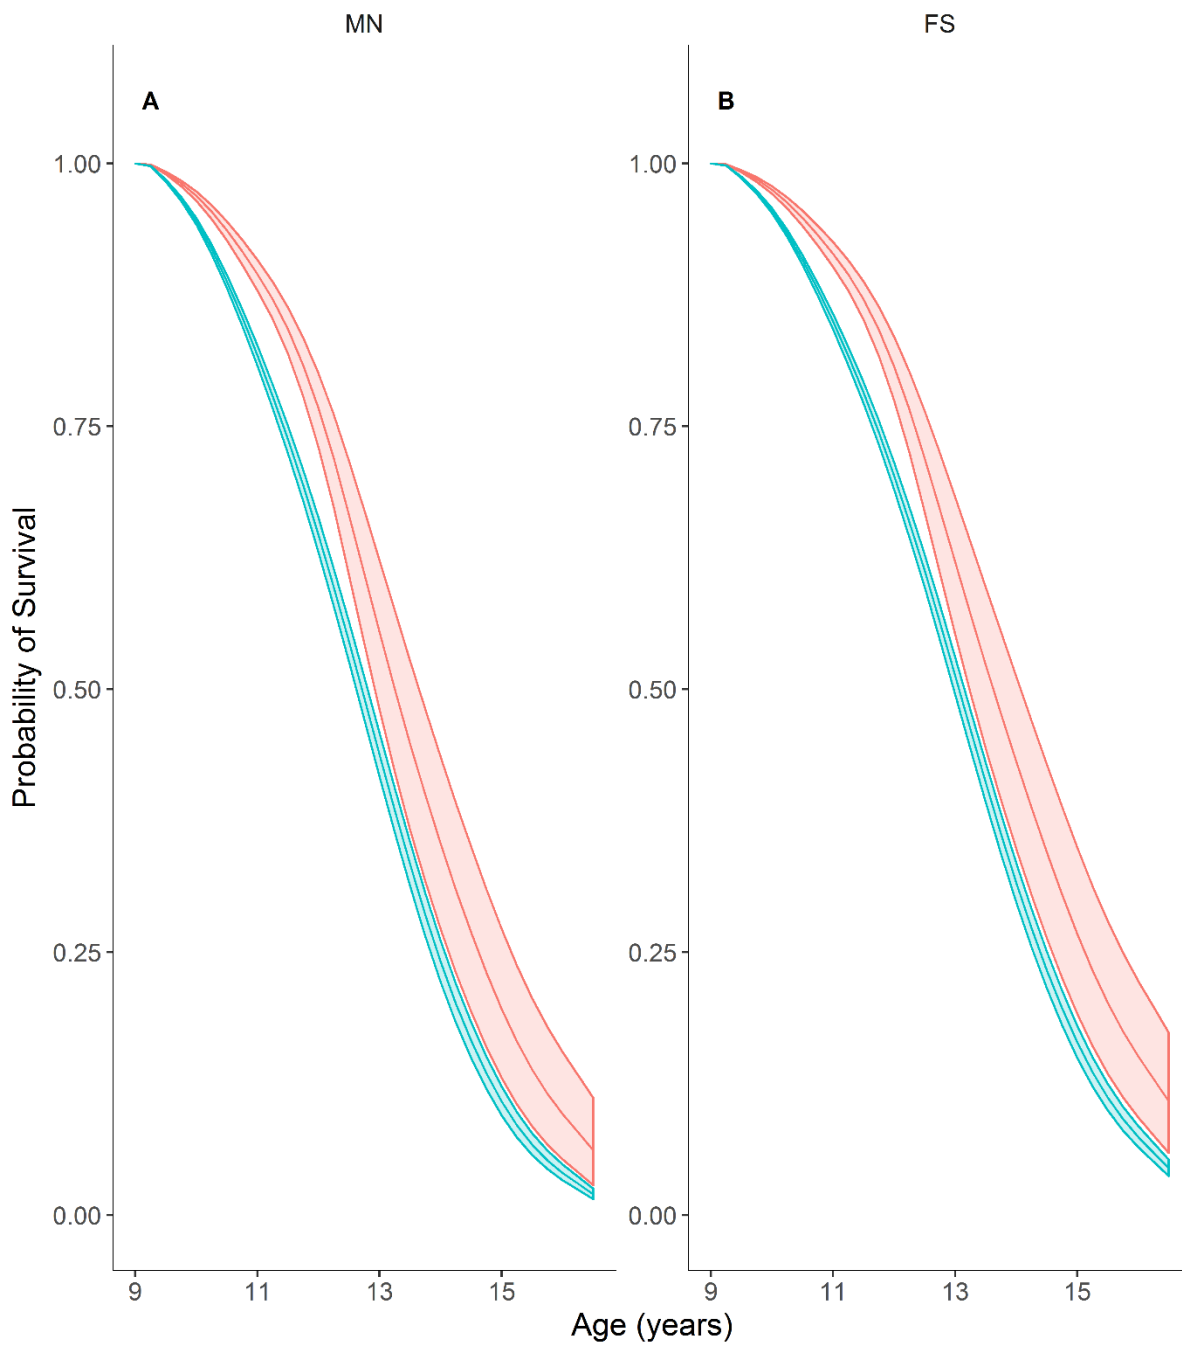



**Supplementary Figure S8. Survival probability models for male neutered (a) and female spayed (b)**

**Pit bull dogs.** Middle lines depict the probability of survival for a dog at 7.5y age in 2003 (assuming survival to at least 9.5 years), with the upper and lower lines depicting 99.79 % confidence intervals. The survival of dogs in the normal body condition group is shown in blue, whilst that of the overweight group is shown in red.

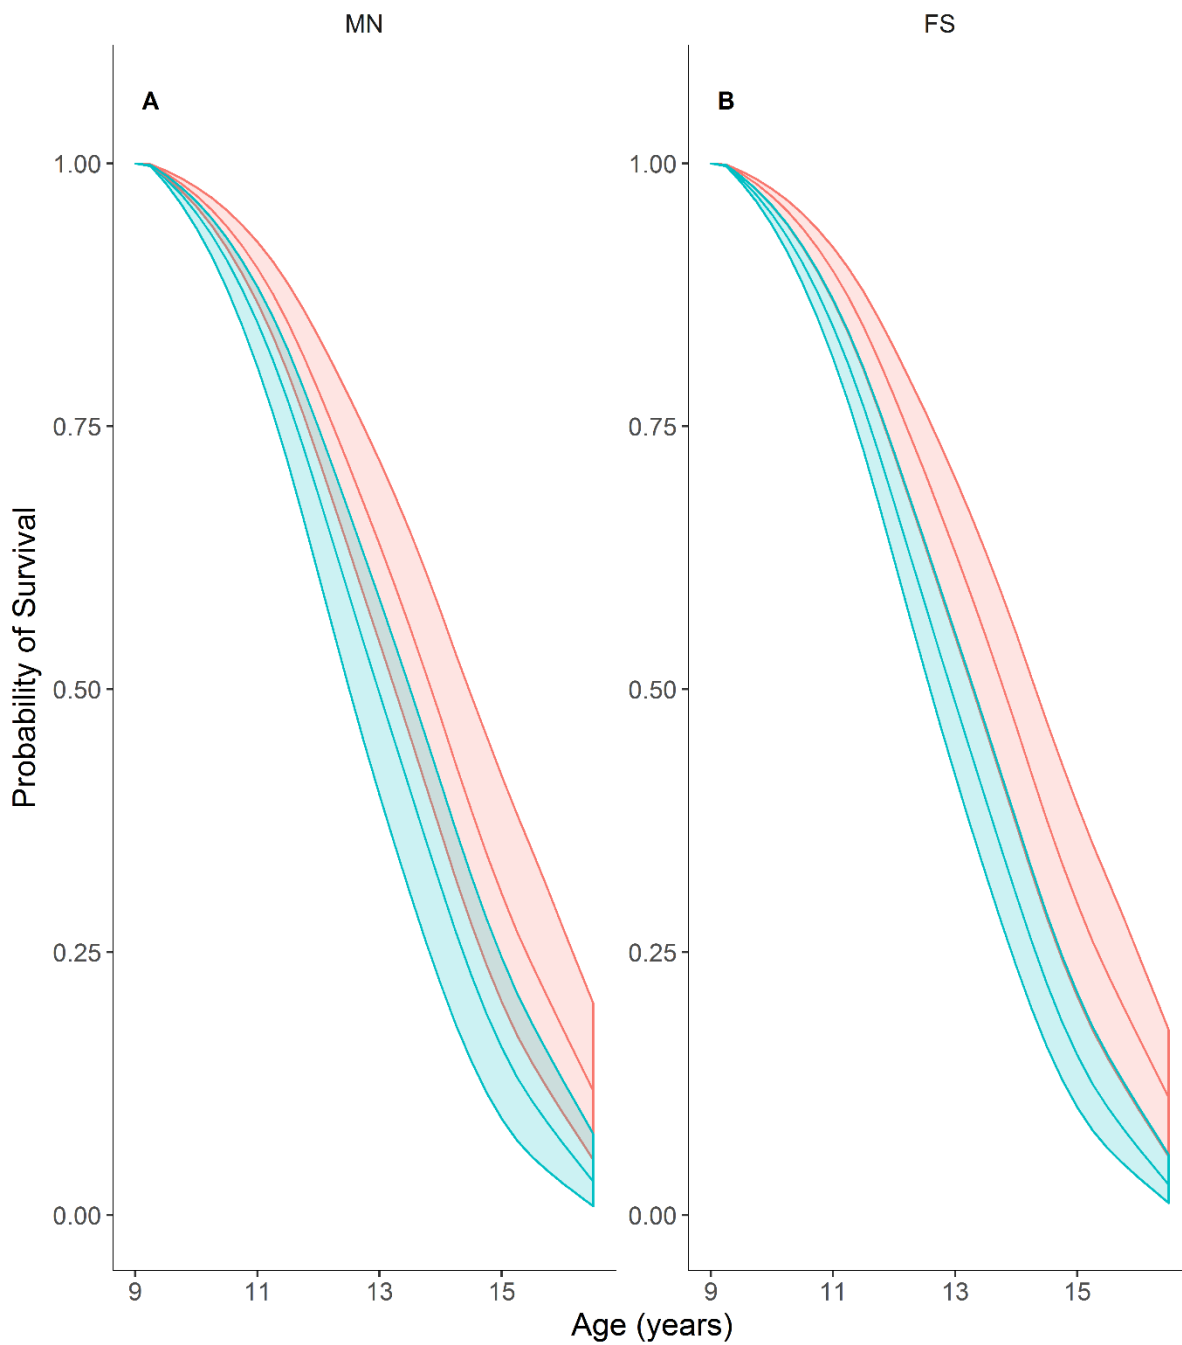

**Supplementary Figure S9. Survival probability models for male neutered (a) and female spayed (b)**

**Shih tzu dogs.** Middle lines depict the probability of survival for a dog at 7.5y age in 2003 (assuming survival to at least 9.5 years), with the upper and lower lines depicting 99.79 % confidence intervals. The survival of dogs in the normal body condition group is shown in blue, whilst that of the overweight group is shown in red.

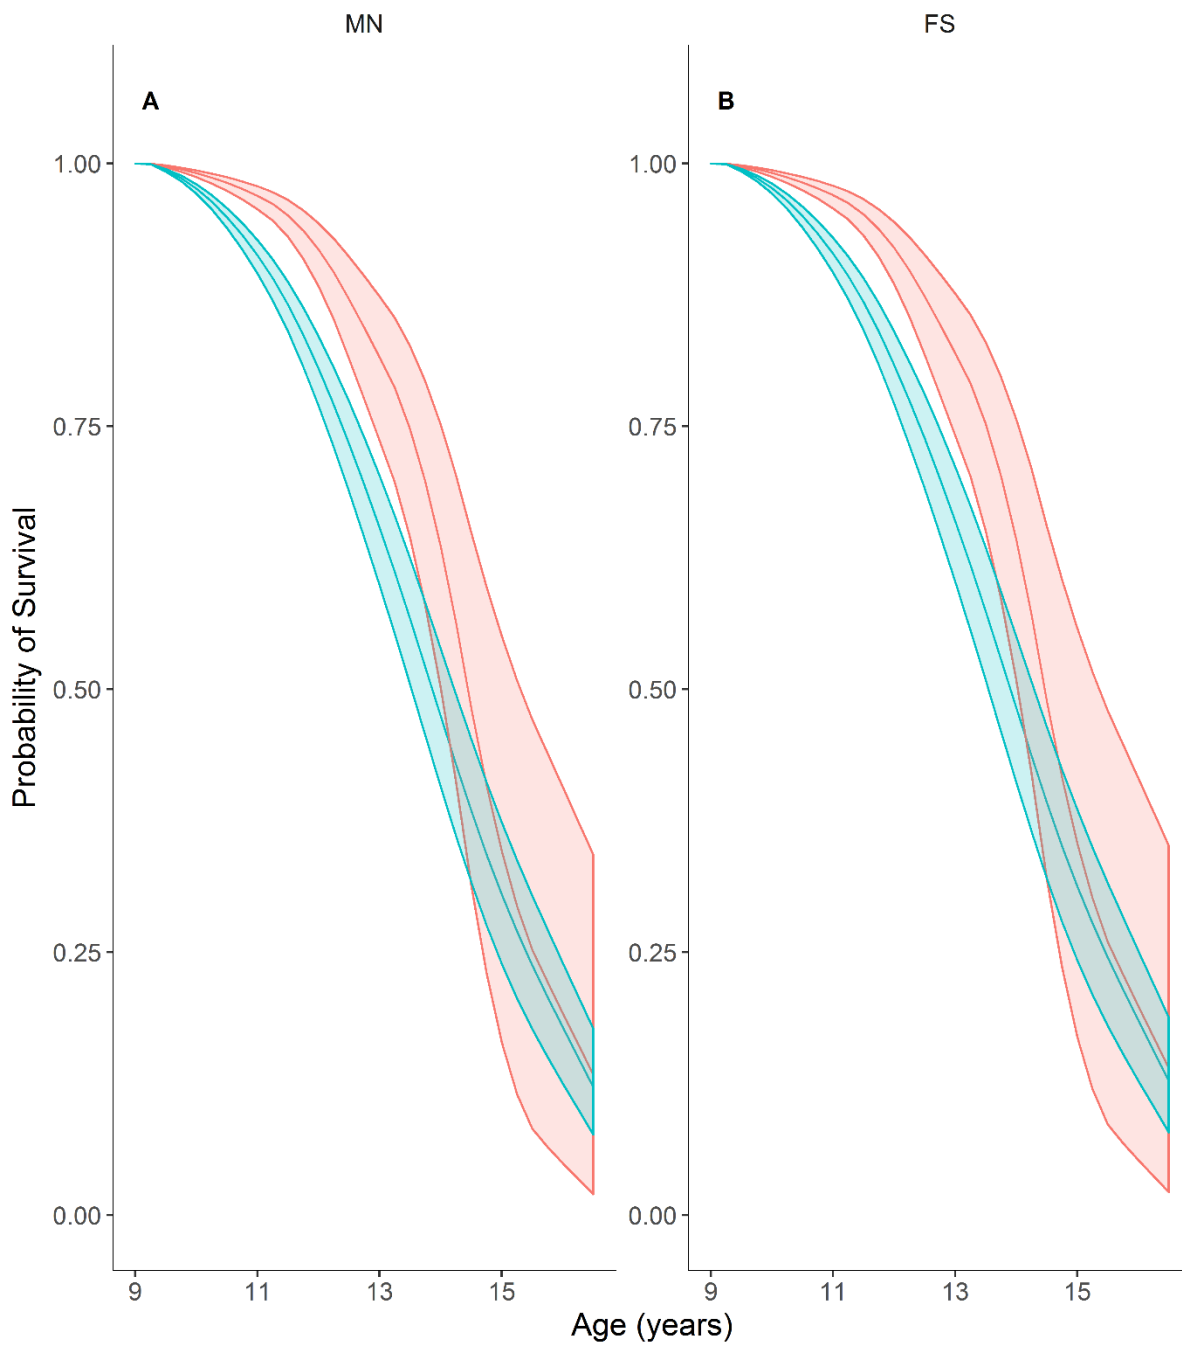

**Supplementary Figure S10. Survival probability models for male neutered (a) and female spayed (b)**

**Yorkshire terrier dogs.** Middle lines depict the probability of survival for a dog at 7.5y age in 2003 (assuming survival to at least 9.5 years), with the upper and lower lines depicting 99.79 % confidence intervals. The survival of dogs in the normal body condition group is shown in blue, whilst that of the overweight group is shown in red.

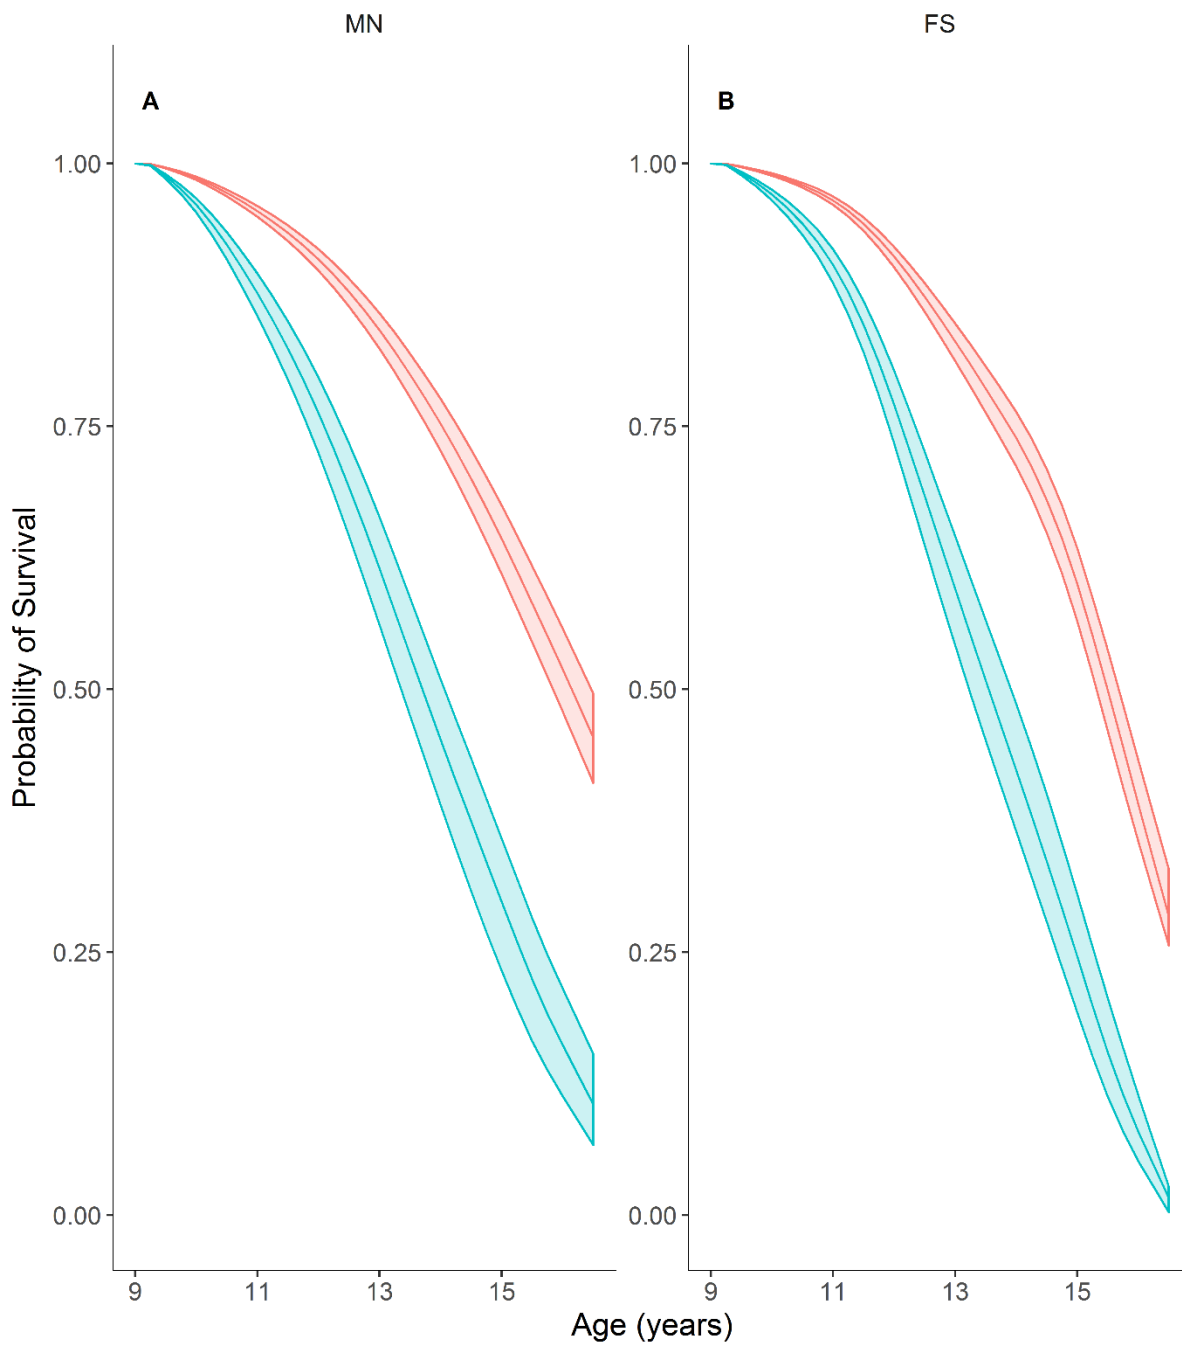

Supplement: JVIM-33-89-s001.pdf [file JVIM-33-89-s001.pdf]
